# Supplementary material
Source: publisher figshare collection journal article supplement (https://future-science-group.figshare.com/ndownloader/files/30820984)
Supplement: Supplementary file 1 [file 30820984]

## Supplements

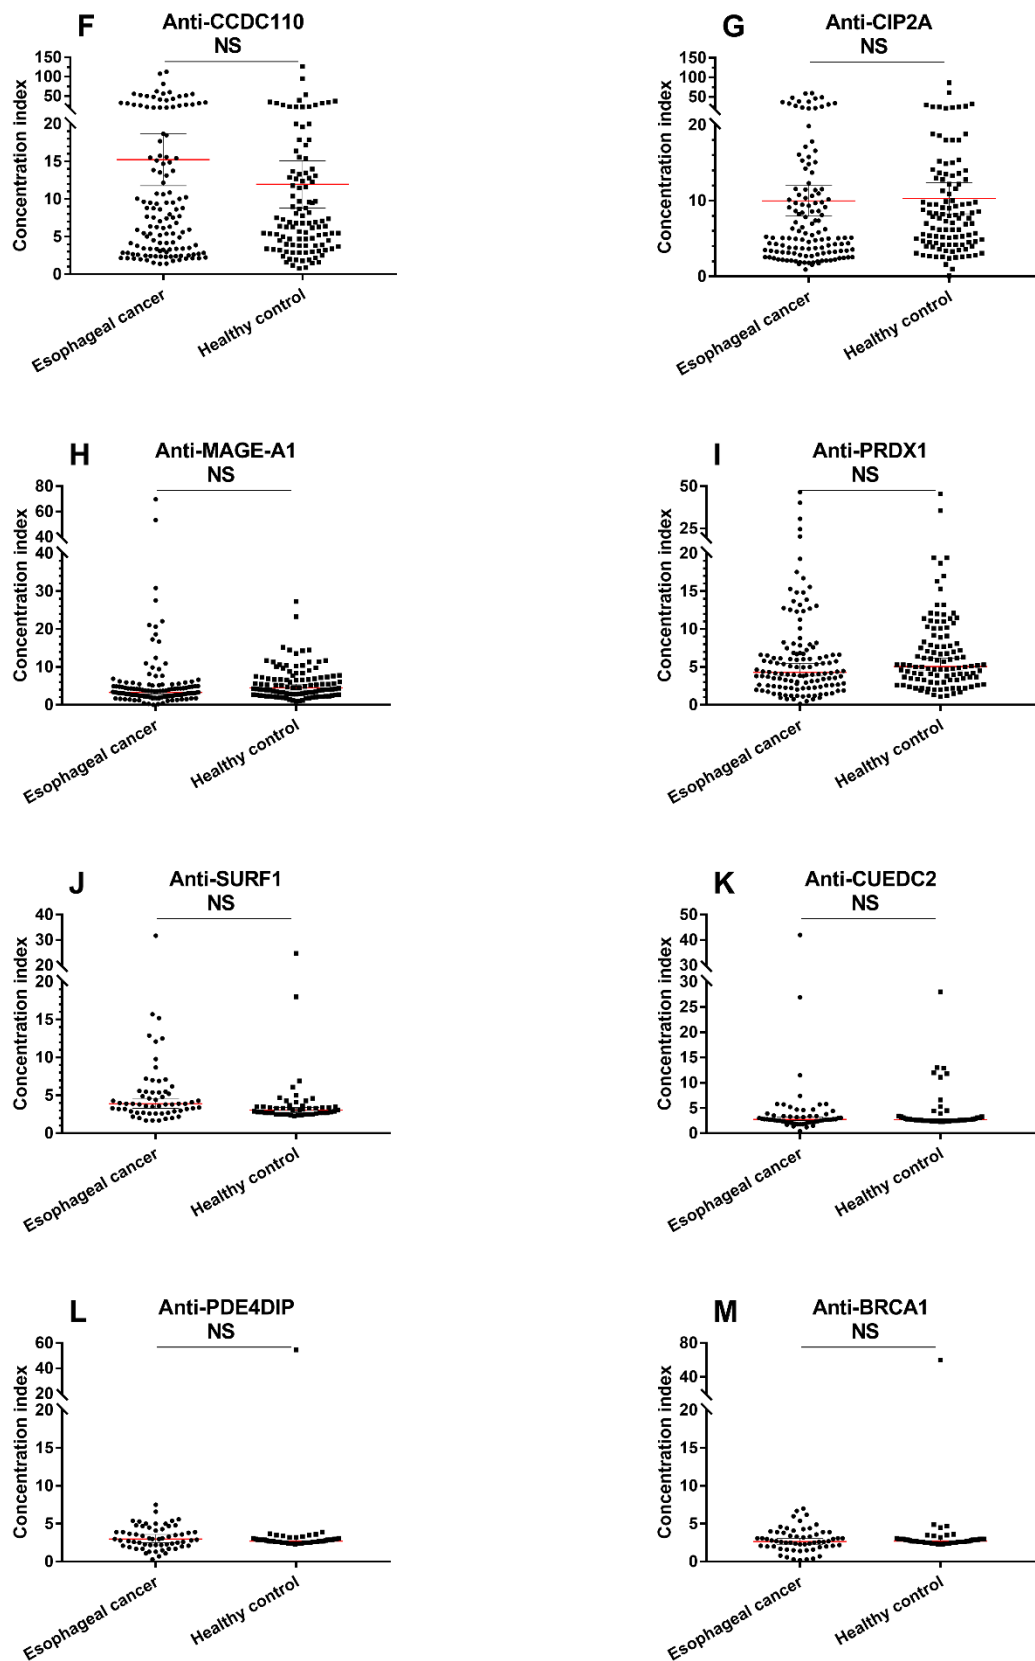

Supplements figure 1. Differences in serum autoantibody concentrations among the different groups.
